# Supplementary material for: Photo-switchable control of pH-responsive actuators via pH jump reaction
Source: Royal Society of Chemistry journal article supplement (doi:10.1039/c2sm07277g), 2012-01-01
Supplement: c2sm07277g.pdf [file c2sm07277g.pdf]

### Supplementary Information

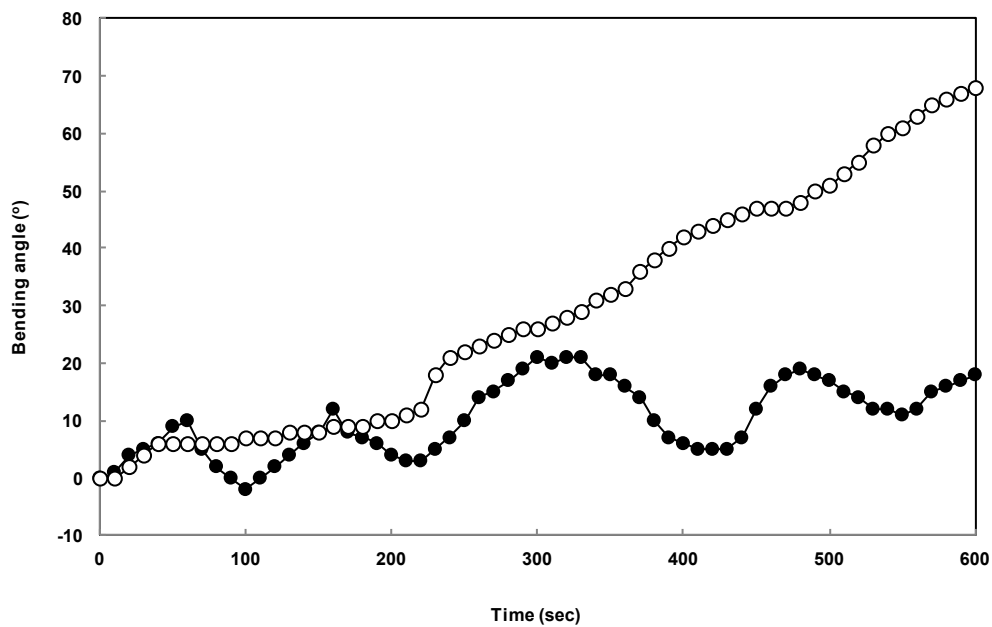

**Fig. S1** The reversible bending and straightening behaviors of 1.0 (closed circle) and 0.1 mM (open circle) NBA-loaded palm-shape bilayer gels consisting of polyacid P(NIPAAm-*co*-CIPAAm) and polybase P(NIPAAm-*co*-DMAPAAm) layers with respect to time.
